# Supplementary material for: Role of flavonoids in inhibiting triple-negative breast cancer
Source: Front Pharmacol. 2024 Aug 27;15:1411059. doi: 10.3389/fphar.2024.1411059 (PMC11384598; doi:10.3389/fphar.2024.1411059)
Supplement: Supplementary file 1 [file Table1.XLSX]

## Sheet: Sheet3
Bioactive molecules	Cell lines	Action on breast cancer	References
Luteolin	MDA-MB-231, 4T1	SGK1↓, p-FOXO3a↓, FOXO3a↑, BNIP3↑, Bcl-2↑, Bax↑, Bim↑, Beclin-1↑, LC3Ⅱ/Ⅰ↑, and P62↓	(Wu et al., 2023)
	BT-20	phosphor-AKT↓, mTOR↓, N-cadherin↓, vimentin↓,	(Wu et al., 2021)
		E-cadherin↑, B-catenin↑, MMP-2↓, MMP-9↓, acetylated H3K27↓, and acetylated H3K56↓
	MDA-MB-231, 4T1	CTGF↓, CYR2↓, p-YAP↑, p-TAZ↑, fibronectin↓,	(Cao et al., 2020)
		N-cadherin↓, vimentin↓, and E-cadherin↑
	MDA-MB-231, BT5-49	vimentin↓, F-actin↓, E-cadherin↑, claudin↑,	(Lin et al., 2017)
		N-cadherin↓, Snail↓, Slug↓, and β-catenin↓
	MDA-MB-231	ABCG2↓, Nanog↓, Oct4↓, CD44↓, Nrf2↓, HO-1↓, Sirt3↓, and Cripto-1↓	(Tsai et al., 2021)
	MDA-MB-231	VEGF↓	(Cook et al., 2016)
	LM2
	MDA-MB-231	VEGF↓, Notch-1↓, Hes-1↓, Hey↓, Cyclin D1↓, and MMP↓	(Sun et al., 2015)
	MDA-MB-453	Bax↑, Bcl-2↓, cleaved caspase-3↑, vimentin↑, Zeb1↑	(Gao et al., 2019)
		N-cadherin↑, E-cadherin↓, Ras↓, Raf↓, p-MEK↓,
		and P-ERK↓
Quercetin	MDA-MB-231	PI3K↓, Akt↓, mTOR↓, PTEN↑, Bax↑, caspase-3↑, Bcl-2↓	(Jiang et al., 2024)
	MDA-MB-231	Foxo3a↑ and p-JNK/JNK↑	(Nguyen et al., 2017)
	MDA-MB-231	FASN↓, β-catenin↓, and Bcl-2↓	(Sultan et al., 2017)
	MDA-MB-157
	MDA-MB-453	HuR↓, CD44↓, and β-catenin↓	(Umar et al., 2022)
	MDA-MB-231	vimentin↓, E-cadherin↑, relative E-cadherin↑,	(Srinivasan et al., 2016)
		β-catenin↑, cyclin D1↓, c-Myc↓, and p-AKT↓
	MDA-MB-231	MMP-2↓, MMP-9↓, VEGF↓, PKM2↓, GLUT1↓, LDHA↓, C3Ⅱ/LC3Ⅰ↑, p-AKT/AKT↓, p-mTOR/mTOR↓, and p-p70s6k/p70S6K	(Jia et al., 2018)
	MDA-MB-231	miR-146a↑, bax↑, caspase-3↑, and EGFR↑	(Tao et al., 2015)
	MDA-MB-231	P-gp↓, BCRP↓, and MRP1↓	(Li et al., 2018a)
	MDA-MB-231	P-glycoprotein↓, BCRP↓, and MRP2↓	(Louisa and Wardhani, 2019)
	MDA-MB-231, MDA-MB-468	p-ERK1/2↓, c-Mye↓, PCNA↓, MMP2↓, and E-cadherin↑	(Zhang et al., 2024b)
	4T1	P-JAK2/JAK2↓, P-STAT3/STAT3↓, the proportion of Treg cells↓, IL-10↓, TNF-α↑, Cleaved caspase-3/Caspase-3↑	(Liao et al., 2024)
Baicalin	MDA-MB-231	MAPK↓, MMP-2↓, MMP-9↓, uPA↓, and uPAR↓	(Wang et al., 2013a)
	MDA-MB-231, 4T1	E-cadherin↑, claudin↑, N-cadherin↓, vimentin↓, Snail↓, Slug↓, and β-catenin↓	(Zhou et al., 2017)
	MDA-MB-231, osteoblasts	OPG↓, RANKL↑, Cytochrome C↑, caspase-3↑, caspase-8↑, caspase-9↑, p-mTOR↓, p-p70↓, OCN↓, and ALP↓	(Wang et al., 2020a)
	MCF-7, MDA-MB-231	miR-338-3p↑ and MORC4↓	(Duan et al., 2019)
	MDA-MB-231	TGF-β1↓, ZEB1↓, N-cadherin↓, E-cadherin↑, lncRNA-MALAT1↓, and miR-200c↑	(Li et al., 2022)
Baicalein	MDA-MB-231	Bax↑, Bcl-2↓, LC3B↑, BECN1↑, IκB↑, p-AKT/AKT↓, and p-mTOR/mTOR↓	(Yan et al., 2018)
	MDA-MB-231	SATB1↓, vimentin↓, Snail↓, E-cadherin↑, Wnt1↓, β-Catenin↓, Axin2↓, and Cyclin D1↓	(Ma et al., 2016)
	MDA-MB-231	LC3B II/I↑, p62↓, PINK1↑, and parkin↑	(Hua et al., 2023)
Daidzein	MDA-MB-453	CDK2↓, CDK4↓, CyclinD↓, CDK1↓, p27Cip2↓, and caspase-9↑	(Choi and Kim, 2008)
Rutin	MDA-MB-231	p-c-Met↓	(Elsayed et al., 2017)
	MDA-MB-231	ASK1↑ and JNK↑	(Suganya et al., 2022)
		MKI67↑, VIM↑, CDH2↑, FN1↑, VEGFA↑, CDH1↓, THBS1↓, N-cadherin↑, VEGFA↑, E-cadherin↓, and thrombospondin 1↓	(Hajimehdipoor et al., 2023)
	4T1	miR‐129‐1‐3p↑	(Hajimehdipoor et al., 2023)
	MDA-MB-231	P-gp↓ and BCRP↓	(Iriti et al., 2017)
Icariin	MDA-MB-468, 4T1	PCNA↓, LC3B-I↑, LC3B-II↑, BECN1↑, P62↓,	(Zhao et al., 2024)
	MDA-MB-231	lncRNA NEAT1↓, E-cadherin↑, ZO-1↑, Vimentin↓, Smad2↓, P-Smad2↓, Smad2/3↓, TGFβ1↓, EpCAM↓, and SOX4↓	(Song et al., 2024)
	MDA-MB-231, MDA-MB-453	ER-α36↓, EGFR↓, Bcl-2↓, BAX↑, cleaved PARP↑, cleaved caspase-3↑, p-MEK↓, and p-ERK↓	(Wang et al., 2017)
	MDA-MB-436, Hs 578T	c-IAP2↓, p-c-Jun↓, p-JNK↓, and JNK↓	(Gao et al., 2023)
	MDA-MB-231	Bcl-2↓, Bax↑, cleaved caspase-3↓, SIRT6↑, H3K9 Ac↓,	(Song et al., 2020)
		E-cadherin↑, N-cadherin↓, and MMP-2↓
Kaempferol	MDA-MB-231	Active RhoA↓, Active Rac1↓, vimentin↑, Snail↑, Slug↑, MMP2↓, and MMP9↓	(Li et al., 2017)
	MDA-MB-231, ex-vivo grown primary breast tumor cells	CD44↓, OCT4↓, NANOG↓, and MDR1↓	(Nandi et al., 2022)
Morin	MDA-MB-231	P-H2A.X↑, RAD51↓, survivin↓, Ku80↓, p-ERK↑, p21↑, cyclin A2↓, cyclin B1↓, p-ERK↑, and FOXM1↓	(Maharjan et al., 2021)
Nobiletin	BT-549	JAZF1↓, NLRP3↑, cleaved caspase-1↑, ASC↑, IL-1β↑, IL-18↑, p-p65/t-p65↑, and p-IkB/t-IkB↑	(Wang et al., 2021)
	MDA-MB-468	cyclin-D1↓, ERK1/2↓, p-AKT↓, p-mTOR↓, p21↑, and Bcl-xL↓	(Wang et al., 2021)
Nobiletin	MDA-MB-231	IkBα ↑	(Kim et al., 2022)
Genistein	MDA-MB-231	Notch-1↓, cyclin B1↓, Bcl-2↓, and Bcl-xL↓	(Pan et al., 2012)
Apigenin	MDA-MB-231	IL-6↓, Snail↓, and N-cadherin↓	(Lee et al., 2019b)
	MDA-MB-231	CD44/CD24+↓, YAP/TAZ↓, CTGF↓, and CYR61↓	(Li et al., 2018b)
	MDA-MB-436
	4T1	Bcl-2/Bax↓, caspase-3/cleaved-caspase-3, ROS↑, p-PI3K/PI3K↓, p-AKT/AKT↓, and Nrf2↓	(Zhang et al., 2024a)
Maackiain	MDA-MB-231 BT549	N-cadherin↓, vimentin↓, E-cadherin↑, miR-374a↓, and GADD24α↑	(Peng et al., 2022)
Amentoflavone	SUM159	CD44↑, ALDH1↑, CD24↓, Gli1↓, Smo↓, Sufu↑, Ptch1↑, NANOG↓, and OCT4↓	(Bao et al., 2019)
ECCG	MDA-MB-231	β-catenin↓, p-Akt↓, and cyclin D1↓	(Hong et al., 2017)
	MDA-MB-231	N-cadherin↓, Vimentin↓, ZO-1↑, occludin↑, and GOLM 1↓	(Xie et al., 2021)
	Hs578T	caspase-1↑, caspase-3↑, caspase-4↑ and PYCARD↑	(Hong et al., 2017)
	MDA-MB-231	SCUBE2↑, E-cadherin↑, vimentin↓, and total DNMTs activity↓	(Sheng et al., 2019)
	MDA-MB-436	ER-α36↓, EGFR↓, p-ERK1/2↓, and p-AKT↓	(Pan et al., 2016)
	NF639	E-cadherin↑, MTA3↑, γ-catenin↑, Snail↓, FOXO3a↑, ERα↑, VASP↓, and Rac1↓	(Belguise et al., 2007)
Baohuoside I	BT549, 4T1	Vimentin↓ and MMP2↓	(Wang et al., 2020b)
Syringin	MDA-MB-231	CDK4↓, p21↑, XIAP↓, cleaved caspase-9↑, and cleaved PARP↑	(Lee et al., 2019a)
	MDA-MB-231	p-EGFR↓, p-HRAS↓, p-MAP2K1↓, p-ERK1/2↓, BAX↑, cleaved caspase-3↑, Bcl-2↓, p-PIK3CA↓, p-AKT↓, p-p65↓, and COX-2↓	(Wang et al., 2022a)
Isoliquiritigenin	MDA-MB-231	Bcl-2↓, Bax↑, cleaved caspase-3↑, cleaved PARP↑, mTOR↓, p-mTOR↓, ULK1↑, p-ULK1↑, p62↑, Beclin1↑, and LC↑	(Lin et al., 2020)
	MDA-MB-231	cytoplasmic Cyt C↑, cleaved caspase-9↑, miR-374a↓, PTEN↑, p-Akt↓, p-GSK3β↓, β-catenin↓	(Peng et al., 2017)
	MDA-MB-231	VEGF↓ and HIF-1α↓	(Wang et al., 2013b)

## Sheet: Sheet4
Bioactive molecules	Study model	Daily experimental group dose	Daily control group drugs	Administration method	Action on breast cancer	References
Luteolin	4T1 mouse models	20 mg/kg, 40 mg/kg	10% DMSO	injection every 7 days for 3 weeks	SGK1↓, p-Foxo3a↓, FOXO3a↑, BNIP3↑, LC3↑, Bax↑, Bim↑, LC3-II/I↑, and Beclin-1↑	(Wu et al., 2023)
	4T1 xenograft murine models	40 mg/kg	vehicle	injection daily for 18 days	YAP/ TAZ↓	(Cao et al., 2020)
	4T1 xenograft murine models	100 mg/kg	0 mg/kg	injection three times every week for 8 weeks	vimentin↓, Slug↓, and β-catenin↓	(Lin et al., 2017)
	MDA-MB-231 (4175) LM2 lung metastasis xenograft model	40 mg/kg	70% DMSO/30% PBS	injection daily for the first week and once every two days until 42 days	lung colonies↓	(Cook et al., 2016)
	MDA-MB-231 mouse model	40 mg/kg, 20 mg/kg	PBS, Paclitaxel 20 mg/kg/d	tail vein injections daily for 14 days	breast cancer xenograft growth↓	(Sun et al., 2015)
Quercetin	MDA-MB-231 mouse model	50 mg/kg	DMSO/0.9%physiologic saline (1:0.5)	injection daily for 25 days	FASN↓	(Sultan et al., 2017)
	4T1 mouse model	50 mg/kgQue, 5 mg/kg Dox plus 50 mg/kg Cyc plus 50 mg/kg Que	0.9% saline, 5 mg/kg Dox plus 50 mg/kg Cyc	injection every other day for 6 administrations	AST↓, LDH↓, and CK↓	(Eski̇ler et al., 2020)
	4T1 mouse model	50 mg/kg Que, physical constraint plus 50 mg/kg Que	0.9 % saline, physical constraint	4 h of physical constraint per day for 12 days; injection every other day for 12 days	the average tumor volume↓, chronic stress-mediated lung metastasis of tumors↓	(Zhang et al., 2024b)
	4T1 mouse model	quercetin 1% plus Cyclophosphamide; quercetin 2.5% plus Cyclophosphamide; and quercetin 5% plus Cyclophosphamide	vehicle, Cyclophosphamide 50 mg kg i.p.	cyclophosphamide injection on 7 days and 21 days, 2 injections in total	frequency of T cells and NK cells↑, frequency of Treg cells↓	(Manni et al., 2023)
		quercetin 1%; quercetin 2.5%; quercetin 5%		culture for 27days
	4T1 mouse model	50 mg/kg, 100 mg/kg, 200 mg/kg	0.5% CMC-Na, 50 mg/kg of 5-FU, formulated in saline	intragastric administration for 14 days	PCNA↓	(Liao et al., 2024)
Baicalin	4T1 mouse model	100 mg/kg	PBS	injection every 3 days until 6 weeks	vimentin↓ and Slug↓	(Zhou et al., 2017)
Baicalein	MDA-MB-231 mouse model	100 mg/kg	1% carboxymethyl cellulose sodium	intra-gastric gavage daily for 21 days	p-AKT↓, Bax↑, and LC3↑	(Yan et al., 2018)
Baicalein	MDA-MB-231 cancer cells mixed with M2 macrophages	50 mg/kg	vehicle	intra-gastric gavage every other day for 5 weeks	iNOS↑, E-cadherin↑, TGF-β1↓, CD206↓, N-cadherin↓, Vimentin↓, and p-Akt↓	(Yan et al., 2018)
	MDA-MB-231 mouse model	50 mg/kg, 100 mg/kg	NS	intragastric gavage daily for 15 days	SATB1↓, Wnt1↓, β-catenin ↓, vimentin↓, SNAIL↓, and E-cadherin↑	(Ma et al., 2016)
Icariin	4T1 mouse model	20 mg/kg, 40 mg/kg	control group drugs	injection daily for 15 days	p-mTOR↓, p-AMPK↑, and p-ULK1↑	(Zhao et al., 2024)
Rutin	MDA-MB-231 xenograft models	30 mg/kg	vehicle	injection 3X/week/mice/i.p. for 28 days	breast cancer xenograft growth↓	(Elsayed et al., 2017)
Nobiletin	MDA-MB-231 xenograft model	10 mg/kg	DMSO or DTX (10 mg/kg) inject once a week for 4 weeks	NOB-containing (0.1%) diet for 43 days	Ki67↓, TNF-α↓, and p-p65↓	(Kim et al., 2022)
Genistein	MDA-MB-231 mouse model	25 mg/kg apigenin dissolved in 100 μL vehicle	100 μL vehicle (20% DMSO, 10% ethanol, 30% KolliphorEL, and 40% PBS)	injected daily for 28 days	ASI CFLARS↓, MAP3K7-A↓, ASI BAXL↑, and CCNL2↑	(Sudhakaran et al., 2023)
Apigenin	MDA-MB-231 mouse model	25 mg/kg, 50 mg/kg	drinking water	diet daily for 2 weeks	pSTAT3↓, pERK↓, PI3K↓, and pAkt↓	(Lee et al., 2019)
	HCI001 Patient-derived xenograft model	1, 5, 10, 25, 50 μM	DMSO	culture for 5 days	breast cancer xenograft growth↓ and viability↓	(Sudhakaran et al., 2020)
	4T1 mouse model	25 mg/kg, 50 mg/kg, and 100 mg/kg	40% PEG400 and 60% double-distilled water, 2 mg/kg/week of DOX	injection for 21 days	PCNA↓ and proportion of Treg cells↓	(Zhang et al., 2024a)
hinokiflavone	MDA-MB-231 mouse model	20 mg/kg, 40 mg/kg	corn oil treated	injected daily for 3 weeks	Ki67↓ and MMP-2↓	(Huang et al., 2020)
Baohuoside i	4T1-Luc xenograft mouse model	10 mg/kg, 20 mg/kg	0.5% carboxymethylcellulose	injected daily for 36 days	vimentin↓, ALDH1A1↓, and β-catenin↓	(Wang et al., 2020b)
			sodium solution
		TAMs + 20 mg/kg/d BHS group, TAMs + CXCL1 + 20 mg/kg/d BHS group	TAMs group	injected daily for 25 days
Isoliquiritigenin	MDA-MB-231 mouse model	25 mg/kg/d, 50 mg/kg/d	PBS	injected daily for 25 days	MVD↓, VEGF↓, p-VEGFR-2↓, and MMP2↓	(Wang et al., 2013b)
	MDA-MB-231 mouse model	2.5 mg/kg, 5.0 mg/kg	0.25 mL/mouse PBS	oral gavage once daily for 2 weeks and for an additional 25 days after implantation	Ki-67↑ and VEGF↓	(Lin et al., 2020)
